# Supplementary material for: Isolation, Characterization, and Biomedical Potential of Phycoerythrin Phycobiliprotein from Kappaphycus alvarezii (Doty) Doty ex Silva: Antimicrobial, Antioxidant, and Anticancer Activities
Source: Research Square preprint supplement (doi:10.21203/rs.3.rs-5880917/v1), 2025-01-30
Supplement: Supplementary file 1 [file 911d53aa64d09789dad99f48.docx]

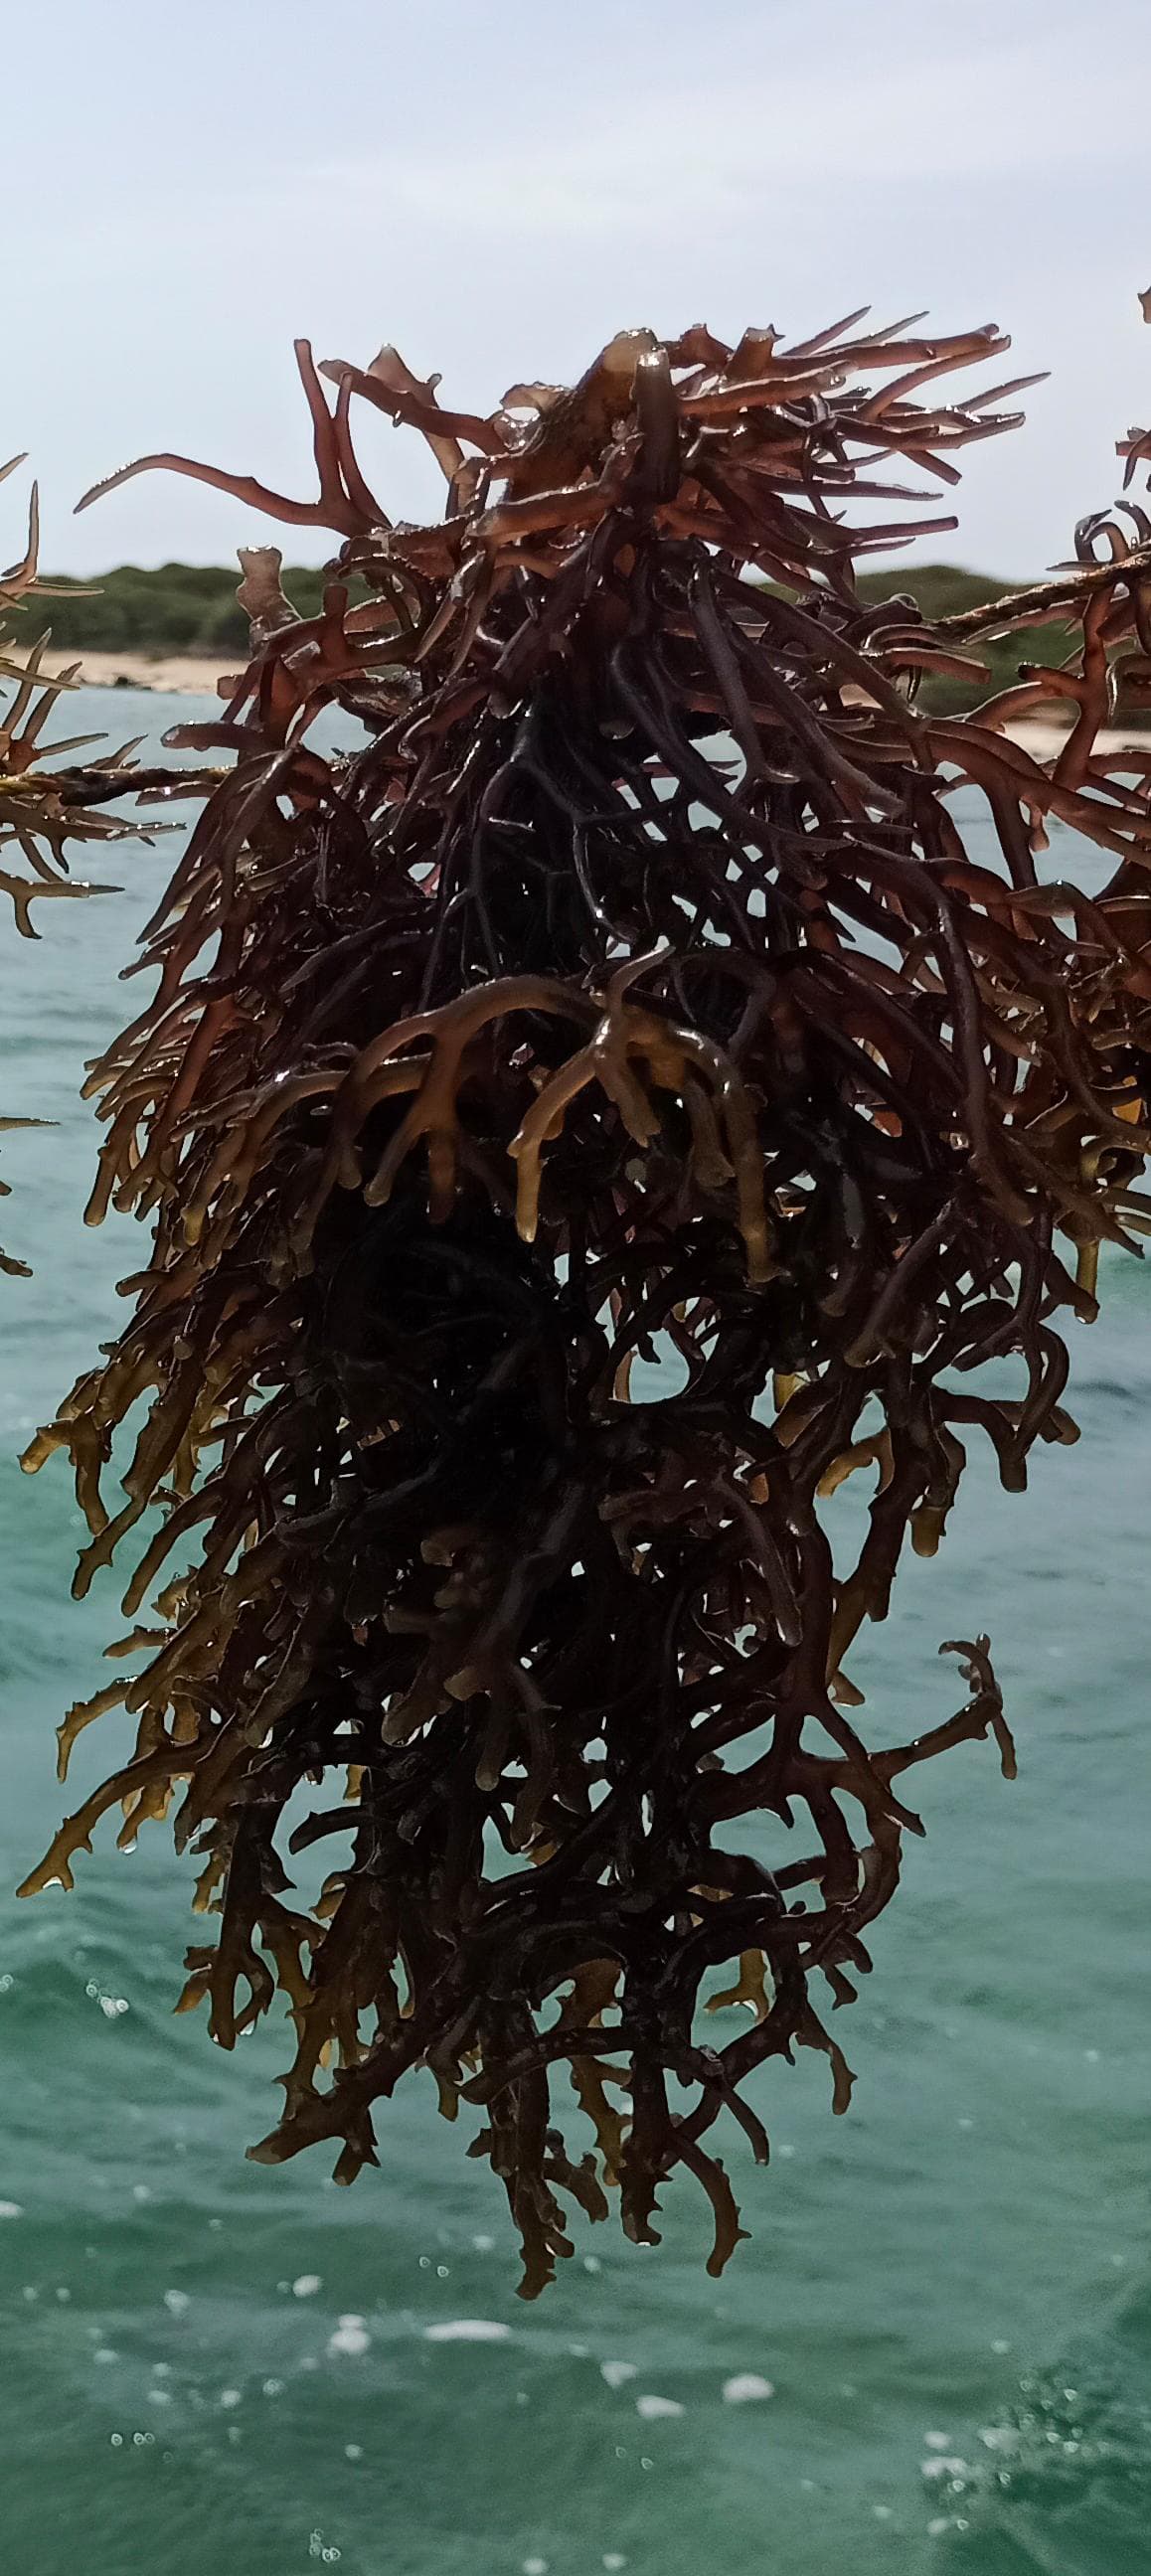


**Fig. 1** *Kappaphycus alvarezii*


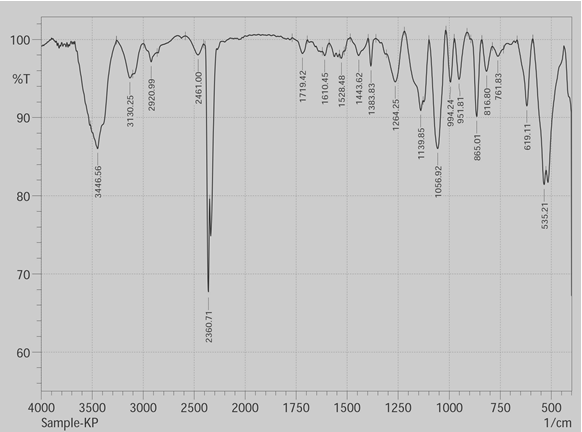


**Fig. 2** FT-IR analysis of phycoerythrin

**
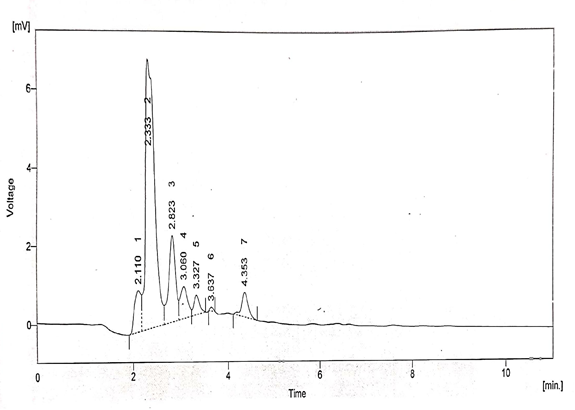
**

**Fig. 3** HPLC analysis of phycoerythrin


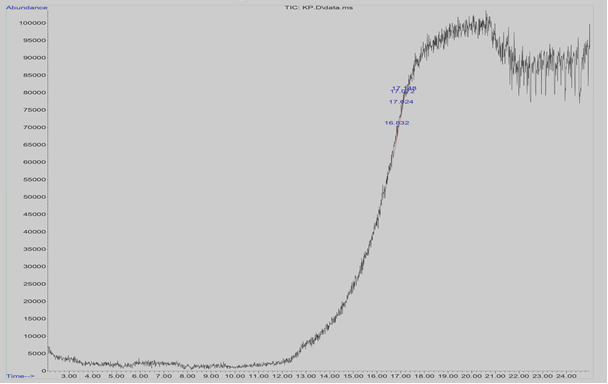


**Fig. 4** GC-MS analysis of phycoerythrin


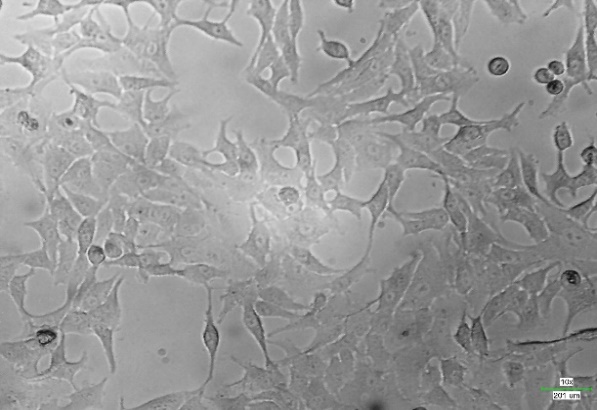

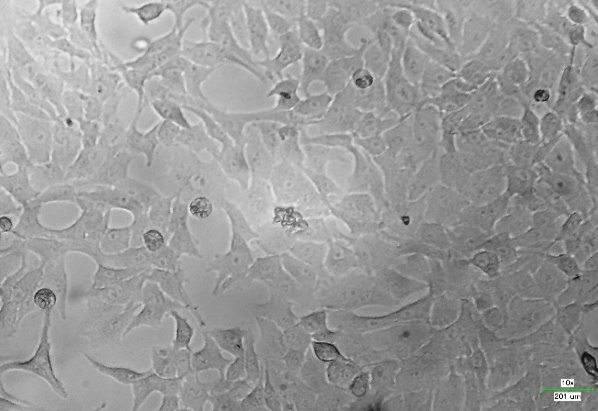


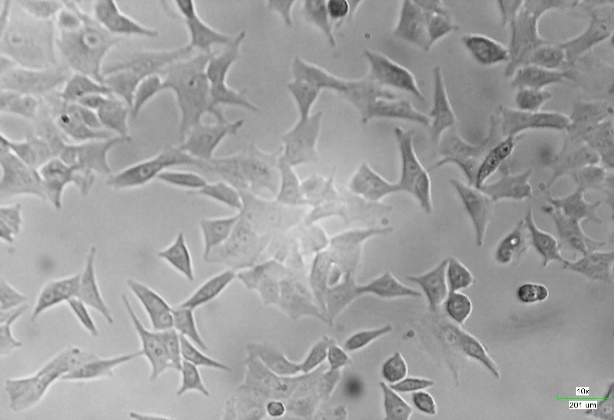

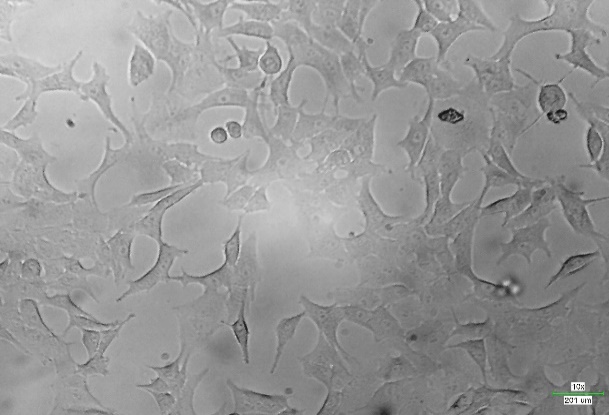
Control cells 50 μg/ml


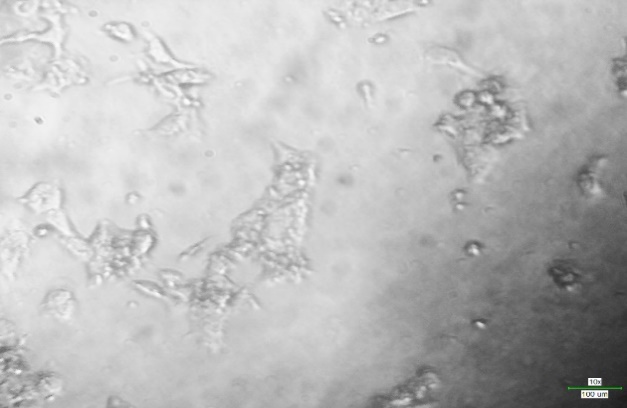

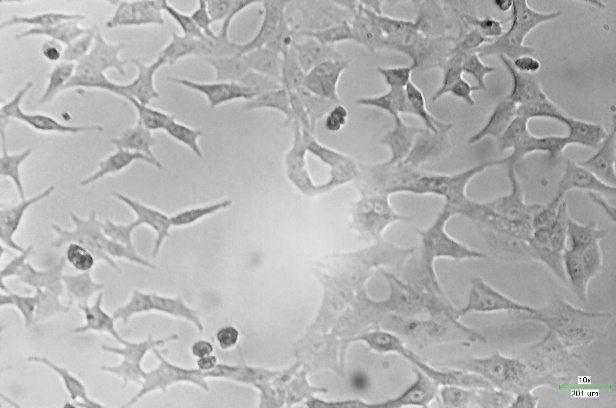
100 μg/ml 200 μg/ml


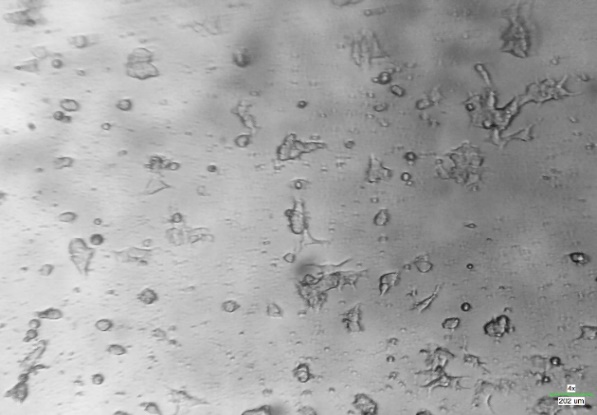
300 μg/ml 400 μg/ml

500 μg/ml

**Fig. 5** The morphological view of human lung cancer cells assesses the proliferation of cell inhibitory concentrations (50, 100, 200, 300, 400, and 500 µg mL-1) of phycoerythrin pigment.

**
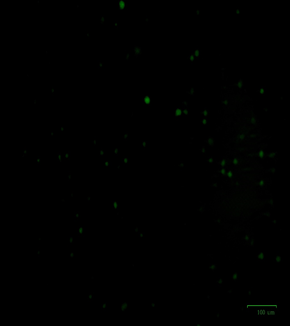
**

**Fig. 6a** Phycoerythrin produces programmed cell death in human lung cancer cells. (a) Control cells exhibited a green color, signifying that the cells were alive


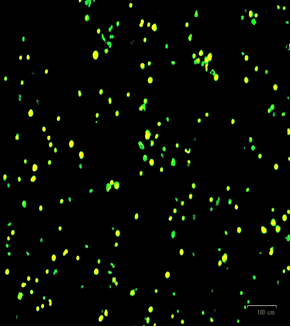


**Fig. 6b** Phycoerythrin produces programmed cell death in human lung cancer cells. (b) Cells treated with phycoerythrin at a concentration of 203.4 μg mL⁻¹ displayed live cells (green color), dead cells (red color), and apoptotic cells (yellow color).

**Fig. 7** The target protein Spore coat polysaccharide biosynthesis protein SpsA docked with the compound of three- and two-dimensional structure such as 1,2-Benzisothiazol-3-amine (a, b), 2-Ethylacridine (c, d), 2,4-Dimethylbenzo[h]quinolone (e, f), 2-bromobutyloxychalcone (g, h) respectively.

**Fig. 8** The target protein S. aureus tyrosyl-tRNA synthetase docked with the compound of three- and two-dimensional structure such as 1,2-Benzisothiazol-3-amine (a, b), 2-Ethylacridine (c, d), 2,4-Dimethylbenzo[h]quinoline (e, f), 2-bromobutyloxychalcone (g, h) respectively.

**Fig. 9** The target protein Isoleucyl-tRNA synthetase docked with the compound of three- and two-dimensional structure such as 1,2-Benzisothiazol-3-amine (a, b), 2-Ethylacridine (c, d), 2,4-Dimethylbenzo[h]quinoline (e, f), 2-bromobutyloxychalcone (g, h) respectively.

**Fig. 10** The target protein Transcriptional regulator qacR docked with the compound of three- and two-dimensional structure such as 1,2-Benzisothiazol-3-amine (a, b), 2-Ethylacridine (c, d), 2,4-Dimethylbenzo[h]quinoline (e, f), 2-bromobutyloxychalcone (g, h) respectively.

**Fig. 11** The target protein HTH-Type Transcriptional Regulator MgrA docked with the compound of three- and two-dimensional structure such as 1,2-Benzisothiazol-3-amine (a, b), 2-Ethylacridine (c, d), 2,4-Dimethylbenzo[h]quinoline (e, f), 2-bromobutyloxychalcone (g, h) respectively.

**Fig. 12** YcgJ protein from Bacillus subtilis [PDB ID 2GLU] with the compound of three- and two-dimensional structure such as 1,2-Benzisothiazol-3-amine (a, b), 2-Ethylacridine (c, d), 2,4-Dimethylbenzo[h]quinoline (e, f), 2-bromobutyloxychalcone (g, h) respectively.

**Fig. 13** The target protein Dihydropteroate synthase docked with the compound of three- and two-dimensional structure such as 1,2-Benzisothiazol-3-amine (a, b), 2-Ethylacridine (c, d), 2,4-Dimethylbenzo[h]quinoline (e, f), 2-bromobutyloxychalcone (g, h) respectively.

**Fig. 14** The target protein Processed Glycerol Phosphate Lipoteichoic Acid Synthase 2 docked with the compound of three- and two-dimensional structure such as 1,2-Benzisothiazol-3-amine (a, b), 2-Ethylacridine (c, d), 2,4-Dimethylbenzo[h]quinoline (e, f), 2-bromobutyloxychalcone (g, h) respectively.

**Fig. 15** The target protein DNA Gyrase Subunit B, DNA Gyrase Subunit A docked with the compound of three- and two-dimensional structure such as 1,2-Benzisothiazol-3-amine (a, b), 2-Ethylacridine (c, d), 2,4-Dimethylbenzo[h]quinoline (e, f), 2-bromobutyloxychalcone (g, h) respectively.

**Fig. 16** The target protein DNA topoisomerase 4 subunit A docked with the compound of three- and two-dimensional structure such as 1,2-Benzisothiazol-3-amine (a, b), 2-Ethylacridine (c, d), 2,4-Dimethylbenzo[h]quinoline (e, f), 2-bromobutyloxychalcone (g, h) respectively.

**Fig. 17** The target protein Dihydrofolate reductase docked with the compound of three- and two-dimensional structure such as 1,2-Benzisothiazol-3-amine (a, b), 2-Ethylacridine (c, d), 2,4-Dimethylbenzo[h]quinoline (e, f), 2-bromobutyloxychalcone (g, h) respectively.

**Fig. 18** The target protein Penicillin-binding protein 3 docked with the compound of three- and two-dimensional structure such as 1,2-Benzisothiazol-3-amine (a, b), 2-Ethylacridine (c, d), 2,4-Dimethylbenzo[h]quinoline (e, f), 2-bromobutyloxychalcone (g, h) respectively.

**Fig. 19** The target protein Transcriptional regulator MvfR docked with the compound of three- and two-dimensional structure such as 1,2-Benzisothiazol-3-amine (a, b), 2-Ethylacridine (c, d), 2,4-Dimethylbenzo[h]quinoline (e, f), 2-bromobutyloxychalcone (g, h) respectively.
